# Supplementary material for: Antibodies From Children With PANDAS Bind Specifically to Striatal Cholinergic Interneurons and Alter Their Activity
Source: Atypon-hosted journal article supplement (doi:10.1176/appi.ajp.2020.19070698), 2020-06-16
Supplement: appi.ajp.2020.19070698.ds001.pdf [file appi.ajp.2020.19070698.ds001.pdf]

 


Psychiatry Online
